# Supplementary material
Source: HighWire-hosted journal article supplement (http://www.jneurosci.org/highwire/filestream/596969/field_highwire_adjunct_files/0/Supplemental_Figure.pdf)
Supplement: Supplemental_Figure.pdf [file Supplemental_Figure.pdf]

**A** Distribution of best frequencies

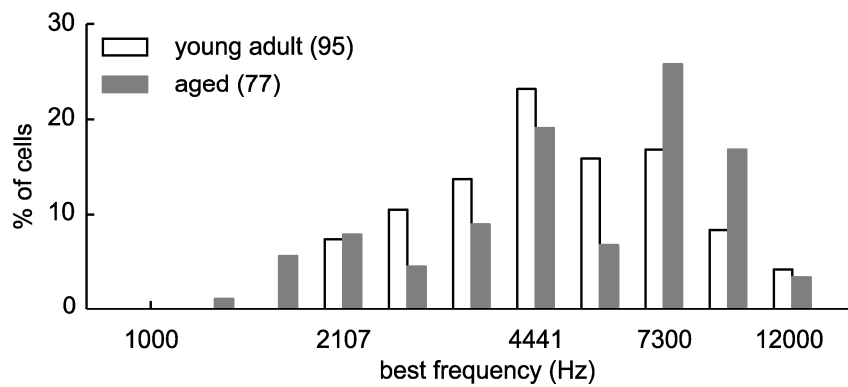

**B** Boxplot of thresholds

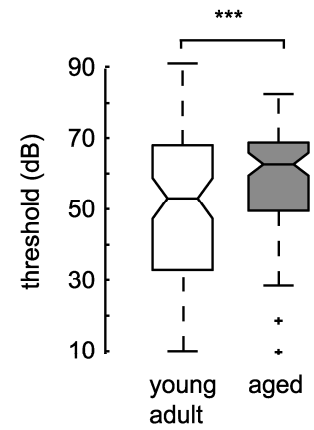

**Supplementary figure 1. Best frequency and threshold distribution.**

(A) Distribution of best frequencies. (B) Box plot of individual neuron thresholds. Lines represent the lower quartile, median, and upper quartile values. The whiskers are the lines extending from each end of the boxes. Whiskers show the extent of the rest of the data. Outliers are shown beyond the ends of the whiskers. Notches represent an estimate of the uncertainty about the median (95 % confidence intervals).
